# Supplementary material
Source: publisher figshare collection journal article supplement (https://diabetesjournals.figshare.com/ndownloader/files/33176342)
Supplement: Supplementary file 1 [file 33176342]

Supplemental Table S1: Hazard Ratios (HR) and 95% Confidence intervals (CI) for the prospective association between gestational diabetes (GDM) and incident type 2 diabetes (T2D); n=46,529\*.

|                                                                        | Ever having GDM pregnancy |                  | Time since last GDM pregnancy |
|------------------------------------------------------------------------|---------------------------|------------------|-------------------------------|
|                                                                        | No GDM                    | GDM              |                               |
| Person-years                                                           | 462, 042                  | 10, 958          | -                             |
| No. of subjects                                                        | 45, 357                   | 1,172            | -                             |
| <b>Model 1: Model with no time-since-GDM interaction</b>               |                           |                  |                               |
| HR (95% CI)                                                            | 1 (ref)                   | 2.52 (2.16-2.93) | -                             |
| <b>Model 2: Model with time-since-GDM interaction term<sup>†</sup></b> |                           |                  |                               |
| GDM effect <sup>†</sup>                                                | 1 (ref)                   | 4.86 (3.20-7.39) | 0.77 (0.67-0.90)              |
| <b>Model 3: Model stratified by time since last GDM</b>                |                           |                  |                               |
| 6-15 years since last GDM pregnancy                                    | 1 (ref)                   | 3.93 (2.65-5.85) | -                             |
| 16-25 years since last GDM pregnancy                                   | 1 (ref)                   | 3.37 (2.67-4.24) | -                             |
| 26-35 years since last GDM pregnancy                                   | 1 (ref)                   | 2.03 (1.52-2.71) | -                             |
| >35 years since last GDM pregnancy                                     | 1 (ref)                   | 1.66 (1.15-2.39) | -                             |

\*Adjusted for race or ethnicity (non-Hispanic white, non-Hispanic black, Hispanic and others (women reporting a race/ethnic background other than non-Hispanic white, Black or Hispanic/Latina), BMI at age 30: under/normal weight: <25, overweight: 25 to <30, obese: ≥30 kg m<sup>2</sup>, and education level (less than high school degree, some college/no degree, associate, or technical degree, bachelor's degree, master, or doctoral degree). <sup>†</sup>HRs (95% CI) for time-since-GDM interaction term is HR=0.77 (0.67-0.90) per decade of time elapsed. The hazard ratio goes down by 23% with every decade of time elapsed.

Supplemental Table S2: Hazard Ratios (HR) and 95% Confidence intervals (CI) for the prospective association between gestational diabetes (GDM) and incident type 2 diabetes (T2D), accounting for the number of GDM pregnancies; n=46,529\*.

|                                                                        | Cumulative number of GDM pregnancies |                               |                               |                               |                               |
|------------------------------------------------------------------------|--------------------------------------|-------------------------------|-------------------------------|-------------------------------|-------------------------------|
|                                                                        | 0                                    | 1                             | 2                             | ≥3                            | Time since last GDM pregnancy |
| Person-years                                                           | 462, 042                             | 9,011                         | 1, 543                        | 405                           | -                             |
| No. of subjects                                                        | 45, 357                              | 952                           | 173                           | 47                            | -                             |
| <b>Model 1: Model with no time-since-GDM interaction</b>               |                                      |                               |                               |                               |                               |
| HR (95% CI)                                                            | 1 (ref)                              | 2.29 (1.92-2.73) <sup>†</sup> | 3.13 (2.22-4.42) <sup>†</sup> | 5.20 (3.02-8.98) <sup>†</sup> | -                             |
| <b>Model 2: Model with time-since-GDM interaction term<sup>‡</sup></b> |                                      |                               |                               |                               |                               |
| GDM effect <sup>‡</sup>                                                | 1 (ref)                              | 4.32 (2.80-6.67)              | 5.70 (3.45-9.40)              | 10.3 (5.28-20.10)             | 0.78 (0.67-0.91)              |
| <b>Model 3: Model stratified by time since last GDM</b>                |                                      |                               |                               |                               |                               |
| 6-15 years since last GDM pregnancy                                    | 1 (ref)                              | 3.56 (2.36-5.36)              | 4.62 (2.83-7.53)              | 7.92 (4.10-15.29)             | -                             |
| 16-25 years since last GDM pregnancy                                   | 1 (ref)                              | 3.07 (2.40-3.94)              | 3.99 (2.72-5.86)              | 6.85 (3.86-12.13)             | -                             |
| 26-35 years since last GDM pregnancy                                   | 1 (ref)                              | 1.87 (1.39-2.53)              | 2.43 (1.57-3.75)              | 4.17 (2.30-7.56)              | -                             |
| >35 years since last GDM pregnancy                                     | 1 (ref)                              | 1.54 (1.06-2.24)              | 2.00 (1.23-3.25)              | 3.43 (1.80-6.55)              | -                             |

\*Adjusted for race or ethnicity (non-Hispanic white, non-Hispanic black, Hispanic and others (women reporting a race/ethnic background other than non-Hispanic white, Black or Hispanic/Latina), BMI at age 30: under/normal weight: <25, overweight: 25 to <30, obese: ≥30 kg m<sup>2</sup>, and education level (less than high school degree, some college/no degree, associate, or technical degree, bachelor's degree, master, or doctoral degree). <sup>†</sup>P-value for trend <0.001. <sup>‡</sup>HRs (95% CI) for time-since-GDM interaction term is HR=0.78 (0.67-0.91) per decade of time elapsed. The hazard ratio goes down by about 22% with every decade of time elapsed.
